# Supplementary material
Source: PubMed Central journal article supplement (PMC7759158)
Supplement: NIHMS1648994-supplement-Supplemental_Figures_1_and_2.pdf [file NIHMS1648994-supplement-Supplemental_Figures_1_and_2.pdf]

## **Supplementary Data**

### **Characterization of human salivary extracellular RNA (exRNA) by next-generation sequencing**

Supplemental Figure 1. The size distributions of the extracted RNA from samples using different methods were assessed using Bioanalyzer.

Supplemental Figure 2. Quantification of RNA samples with or without rRNA depletion.

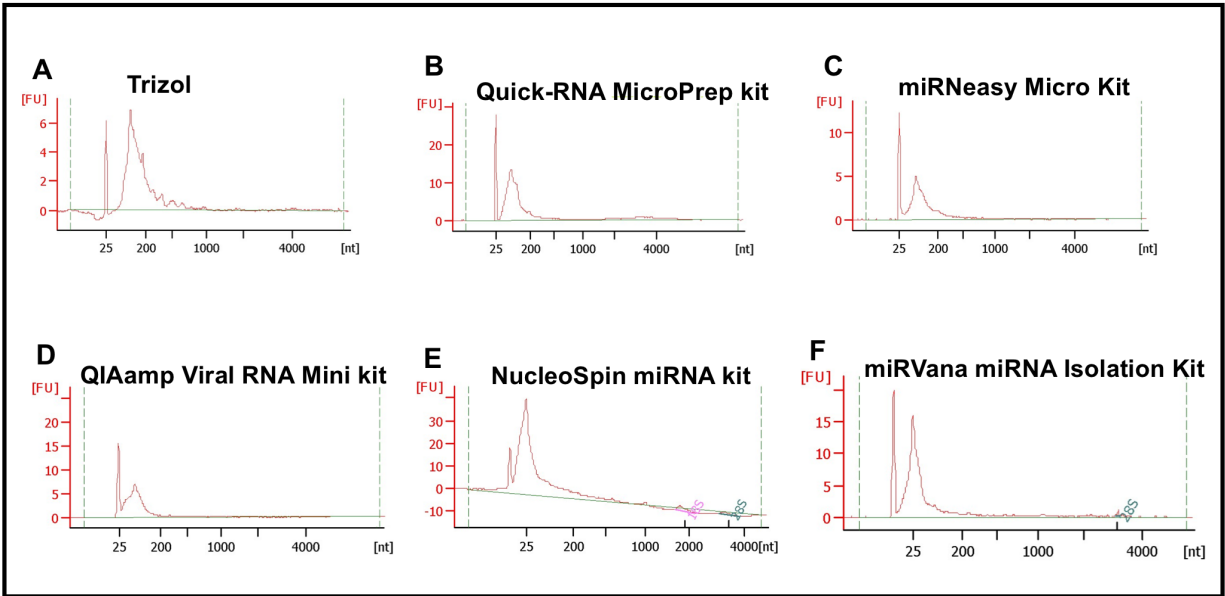

**Supplemental Figure 1.** The size distributions of the extracted RNA from samples using different methods were assessed using Bioanalyzer. The methods are **(S1A)** Trizol (ThermoFisher Scientific), **(S1B)** Quick-RNA MicroPrep kit (Zymo Research), **(S1C)** miRNeasy Micro Kit (Qiagen), **(S1D)** QIAamp Viral RNA Mini kit (Qiagen), **(S1E)** NucleoSpin miRNA kit (Macherey-Nagel), **(S1F)** mirVana miRNA Isolation Kit (ThermoFisher Scientific).

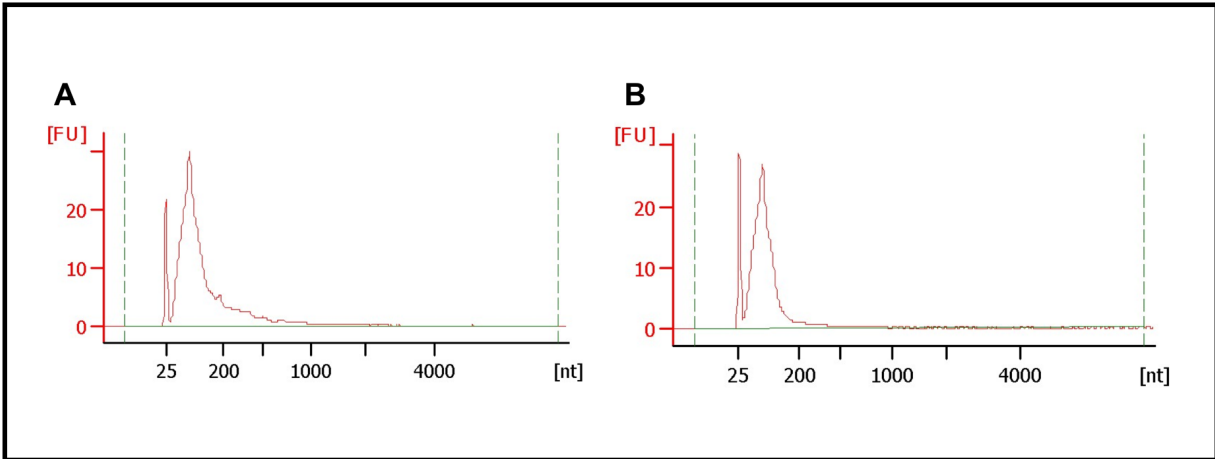

**Supplemental Figure 2.** Quantification of RNA samples with or without rRNA depletion. The size profile of salivary exRNA before rRNA depletion (**S2A**) and after rRNA depletion (**S2B**) was assessed with Bioanalyzer.
